# Supplementary material
Source: PubMed Central journal article supplement (PMC2824322)
Supplement: 0911610107_pnas.0911610107_SI.pdf [file 0911610107_pnas.0911610107_SI.pdf]

# Supporting Information

Tapley et al. 10.1073/pnas.0911610107

## SI Text

**Materials and Methods. Analytical ultracentrifugation.** Sedimentation velocity experiments were carried out using a ProteomeLab XL-I (Beckman Coulter). A protein concentration of 5  $\mu\text{M}$  was used for each sample. Samples were loaded into sector-shaped double channel centerpieces, temperature-equilibrated for 2 h prior to sedimentation in the non-spinning rotor, and spun at 30,000 rpm and 20 °C using an AN50TI rotor. Absorbance scans were collected continuously at a wavelength of 225 nm. Data analysis was with the enhanced van Holde-Weischet analysis module S1, and 2D spectrum analysis (2-DSA) was carried out using the finite element modeling provided with the Ultrascan software [<http://www.ultrascan.uthscsa.edu>(S2, S3)]. A particle sedimenting in a gravitational field experiences two opposing forces, the sedimentation force and the buoyant force. Sedimentation is proportional to the mass of the particle and since a sedimenting particle experiences a frictional drag, based on the shape it will experience a frictional force. The 2-DSA analysis method solves a sedimentation profile with respect to both forces and thus provides information about the sedimentation and the frictional coefficient from which conclusions about the molecular mass and shape of a sedimenting particle can be drawn. The sedimentation profiles were analyzed at a grid resolution of 62,500 using 25 grid repetitions. Confidence levels for statistics were derived from 2-DSA data refinement using genetic algorithm followed by 50 Monte Carlo simulations. Calculations to analyze analytical ultracentrifugation data were performed on the UltraScan LIMS cluster at the Bioinformatics Core Facility at the University of Texas Health Science Center at San Antonio, the Lonestar cluster at the Texas Advanced Computing Center (supported by National Science Foundation Teragrid Grant MCB070038 to Borries Demeler), and the National Supercomputer HLRB-II at the Leibniz-Rechenzentrum, Munich, Germany (supported by Project pr28ci to Johannes Buchner and T.M.F.).

**MDH unfolding, refolding and activity assays.** MDH (from porcine heart mitochondria, Roche) refolding was monitored by testing for enzymatic activity, essentially as described previously (S4). Samples of 1  $\mu\text{M}$  MDH were held at low pH (in buffer A, pH 2) for 1 h at 37 °C in the absence or presence of 0.5, 1, or 2  $\mu\text{M}$  HdeA, or in the presence of 2  $\mu\text{M}$  HdeB or 2  $\mu\text{M}$  BSA, followed by a 10 min temperature equilibration at 20 °C. Then, the samples were neutralized by addition of 0.133 volumes of 0.5 M sodium phosphate pH 8, and 10  $\mu\text{l}$  aliquots were taken at various time points to determine MDH activity. The final MDH concentration in the assay buffer (50 mM sodium phosphate, 1 mM oxaloacetate, and 150  $\mu\text{M}$  NADH) was 8.8 nM. Activity was then assessed by monitoring the absorbance decrease at 340 nm due to the conversion of  $\beta\text{-NADH}$  to  $\beta\text{-NAD}^+$ . Activity is reported relative to 8.8 nM native MDH that had been kept at pH 7. Absorbance was monitored by using a Cary100 spectrophotometer equipped with a Peltier temperature control block set to 20 °C.

**Alkaline phosphatase unfolding, refolding and activity assays.** Alkaline phosphatase (from *E. coli*, Sigma Aldrich) refolding following acid denaturation was monitored by testing for enzymatic activity. Samples of 3  $\mu\text{M}$  alkaline phosphatase were held at low pH (buffer A, pH 2) for 1 h at 37 °C in the absence or presence of HdeA (1.5, 3 or 6  $\mu\text{M}$ ), or in the presence of 6  $\mu\text{M}$  BSA or 6  $\mu\text{M}$  HdeB. After the low pH incubation, samples were equilibrated to 20 °C for 10 min. The samples were then neutralized by addition of 0.133 volumes of 0.5 M sodium phosphate pH 8, and 5  $\mu\text{l}$  aliquots were taken at various time points to determine alkaline phosphatase activity, which was measured using a procedure provided by Sigma. This method uses the substrate p-nitrophenyl phosphate and the associated absorbance increase at 405 nm upon the enzymatic cleavage of the phosphate group to yield the products  $P_i$  and p-nitrophenol. Activity assays were performed at 20 °C in 100 mM glycine, 1 mM  $\text{MgCl}_2$  and 1 mM  $\text{ZnCl}_2$ , pH 10.4. Activity is reported relative to an equivalent amount of native alkaline phosphatase.

**Aldolase unfolding, refolding and activity assays.** Aldolase (from rabbit muscle, Sigma Aldrich) refolding was monitored by testing for enzymatic activity. Samples of 2.5  $\mu\text{M}$  aldolase were held at low pH (buffer A, pH 2) for 1 h at 37 °C in the absence or presence of 1.25, 2.5 or 5  $\mu\text{M}$  HdeA, followed by a 10 min temperature equilibration at 20 °C. Then, the samples were neutralized by addition of 0.133 volumes of 0.5 M sodium phosphate pH 8, and 20  $\mu\text{l}$  aliquots were taken at various time points to determine aldolase activity, which was determined according to the coupled enzyme procedure provided by Sigma Aldrich. Briefly, aldolase converts its substrate fructose 1,6-diphosphate to glyceraldehyde 3-phosphate and dihydroxyacetone phosphate.  $\alpha$ -Glycerophosphate dehydrogenase is then used to convert NADH and dihydroxyacetone phosphate to  $\beta\text{-NAD}^+$  and  $\alpha$ -glycerophosphate. Thus aldolase activity can be monitored by the absorbance increase at 340 nm associated with conversion of  $\beta\text{-NAD}^+$  to  $\beta\text{-NADH}$ . Activity is reported relative to an equivalent amount of native aldolase.

**GAPDH unfolding, refolding and activity assays.** GAPDH (from baker's yeast, Sigma Aldrich) refolding was monitored by testing for enzymatic activity. A sample of 0.25  $\mu\text{M}$  GAPDH was held at low pH (buffer A, pH 2) for 1 h at 37 °C in the absence or presence of 0.25  $\mu\text{M}$  HdeA. Then, the samples were neutralized by addition of 0.133 volumes of 0.5 M sodium phosphate pH 8, and 10  $\mu\text{l}$  aliquots were taken at various time points to determine GAPDH activity, which was determined by monitoring the absorbance increase associated with the conversion of  $\beta\text{-NAD}^+$  to  $\beta\text{-NADH}$ . Assay buffer contained 1 mM  $\beta\text{-NAD}^+$ , 4 mM glyceraldehyde-3-phosphate and 10 mM EDTA in 0.1 M potassium phosphate pH 7.4. Activity is reported relative to an equivalent amount of native GAPDH.

1. Demeler B, van Holde KE (2004) Sedimentation velocity analysis of highly heterogeneous systems. *Anal Biochem* (335)2:279–288
2. Miller AD, Maghlaoui K, Albanese G, Kleinjan DA, Smith C (1993) *Escherichia coli* chaperonins cpn60 (groEL) and cpn10 (groES) do not catalyze the refolding of mitochondrial malate dehydrogenase. *Biochem J* 291:139–144
3. Brookes E, Cao W, Demeler B (2009) A two-dimensional spectrum analysis for sedimentation velocity experiments of mixtures with heterogeneity in molecular weight and shape. *Eur Biophys J*. PubMed PMID: 19: 247646.
4. Demeler B, Brookes E, Nagel-Steger L (2009) Analysis of heterogeneity in molecular weight and shape by analytical ultracentrifugation using parallel distributed computing. *Methods Enzymol* 454:87–113.
5. Rosen CG, Weber G (1969) Dimer formation from 1-amino-8-naphthalenesulfonate catalyzed by bovine serum albumin. A new fluorescent molecule with exceptional binding properties. *Biochemistry* 8:3915–3920
6. Tapley TL, (2009) Structural plasticity of an acid-activated chaperone allows promiscuous substrate binding. *Proc Natl Acad Sci USA* 106: 5557–5562.
7. Gajiwala KS, Burley SK (2000) HDEA, a periplasmic protein that supports acid resistance in pathogenic enteric bacteria. *J Mol Biol* 295:605–612.













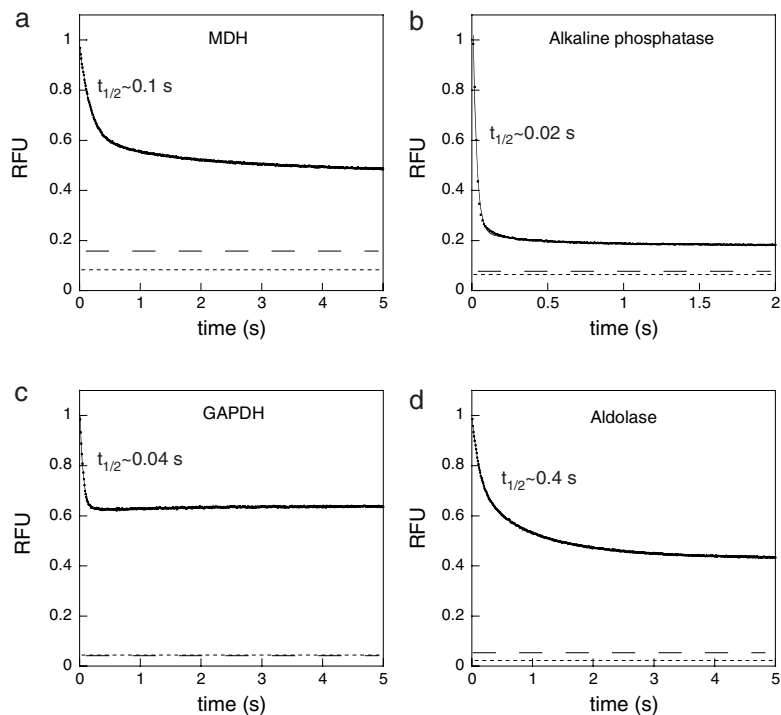

**Fig. S7.** Decrease in fluorescence of substrate-bound bis-ANS following pH neutralization indicates fast folding to a less hydrophobic intermediate state. 10  $\mu$ M bis-ANS was pre-incubated with 100 nM MDH (A), Alkaline phosphatase (B) GAPDH (C), or aldolase (D) at pH 2, and was loaded into syringe A of a Kintek SF2004 stopped flow system. After a 5-min incubation at 20  $^{\circ}$ C, the pH was neutralized by rapid mixing with an equal volume of 0.125 M sodium phosphate containing 10  $\mu$ M bis-ANS, pH 8.0 for a final pH of  $\sim$ 7. Upon neutralization, the decrease in bis-ANS fluorescence was monitored (excitation equals 390 nm, emission equals 450 nm longpass filter). The fluorescence decrease is consistent with each substrate folding to an intermediate state (or ensemble of intermediates) that is less competent to bind bis-ANS. The short dashed lines in each panel show the fluorescence of bis-ANS alone in the absence of substrate; the long dashed lines mark the fluorescence of bis-ANS in the presence of native substrate protein (100 nM) at pH 7. The fluorescence in each panel was normalized to the maximum signal; i.e., that of bis-ANS in the presence of the acid-denatured protein. Each curve was fit to a double exponential function, with the following curve fit parameters: (A)  $A_1 = 0.39$ ,  $k_1 = 5.4$   $s^{-1}$ ,  $A_2 = 0.12$ ,  $k_2 = 0.43$   $s^{-1}$ ; (B)  $A_1 = 1.2$ ,  $k_1 = 41$   $s^{-1}$ ,  $A_2 = 0.05$ ,  $k_2 = 2.1$   $s^{-1}$ ; (C)  $A_1 = 0.45$ ,  $k_1 = 19$   $s^{-1}$ ,  $A_2 = -0.02$ ,  $k_2 = 0.60$   $s^{-1}$ ; (D)  $A_1 = 0.32$ ,  $k_1 = 7.1$   $s^{-1}$ ,  $A_2 = 0.25$ ,  $k_2 = 0.91$   $s^{-1}$ . The half-times given in A–C are for the fast decay phase, which comprised the majority of the overall fluorescence decrease; the half-time in D is an average of the two observed exponential phases, as the amplitudes for the two observed exponential phases were approximately equal.

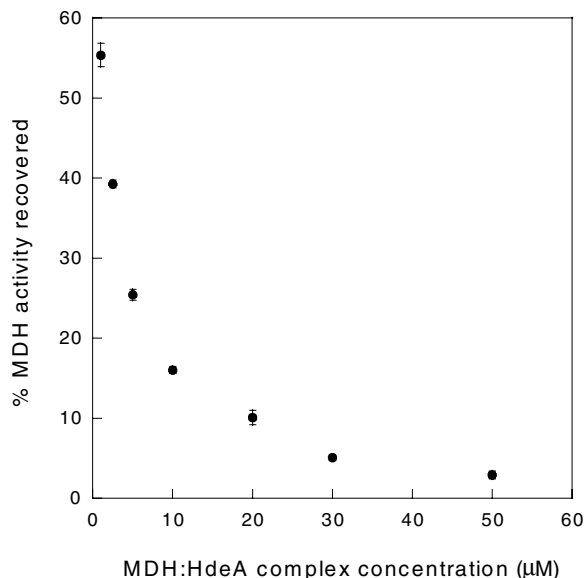

**Fig. S8.** Increasing HdeA:MDH complex concentration leads to decreasing MDH refolding yields. HdeA was incubated in buffer A, pH 2 at a concentration of 1, 2.5, 5, 10, 20, 30, or 50  $\mu$ M. To each sample, and equimolar amount of MDH was added, and the complexes were incubated at low pH for 1 h at 37  $^{\circ}$ C. The temperature was then re-equilibrated to 20  $^{\circ}$ C for 10 min. After equilibration, the pH was neutralized by addition of 0.133 volumes 0.5 M sodium phosphate pH 8. Refolding was allowed to proceed for 3 h, after which the MDH activity of each sample was measured in triplicate. Error bars represent 1 s.d. Activity is reported relative to an equivalent amount of native MDH.



**Table S1. Summary of analytical ultracentrifugation data**

| Sample   | pH    | Mw (kDa)  | Sw20 (1e-13 s) | Sed Coefficient (1e-13 s) | f/f0             |
|----------|-------|-----------|----------------|---------------------------|------------------|
| HdeA     | 2     | 19.5 – 1  | 2.09           | 2.09 – 0.04               | 1.26 – 0.02      |
| HdeA     | 7     | 9.1 – 1   | 1.19           | 1.19 – 0.09               | 1.33 – 0.04      |
| HdeA     | 2 → 7 | 18.8 – 1  | 2.07           | 2.07 – 0.02               | 1.24 – 0.01      |
| MDH      | 7     | 59.8 – 2  | 4.33           | 4.33 – 0.05               | 1.18 – 0.02      |
| MDH      | 2     | 150–800   | 13.34          | ND                        | ND               |
| MDH      | 2 → 7 | 170–2200  | 21.40          | ND                        | ND               |
| HdeA+MDH | 2     | 140–400   | 10.75          | ND                        | ND               |
| HdeA+MDH | 2 → 7 | 18/69 – 2 | 8.36           | 2.17/4.43 – 0.05          | 1.15/1.27 – 0.02 |
